# Supplementary material
Source: PubMed Central journal article supplement (PMC2932777)
Supplement: NIHMS218922-supplement-03.pdf [file NIHMS218922-supplement-03.pdf]

## Lynn et al Supplemental Table 1

## PGC-Dox vs. Con-Dox

Expression analysis showing 2 fold change at a 5% FDR.

| Probe Set | Gene Title full                                                                | Gene Symbol    | FC_Pgc_Dox_vs_Wt_Dox |
|-----------|--------------------------------------------------------------------------------|----------------|----------------------|
| 1448996_ε | rod outer segment membrane protein 1                                           | Rom1           | 12.19                |
| 1424638_ε | cyclin-dependent kinase inhibitor 1A (P21)                                     | Cdkn1a         | 10.29                |
| 1460336_ε | peroxisome proliferative activated receptor, gamma, coactivator 1 alpha        | Ppargc1a       | 9.30                 |
| 1424443_ε | hepatoma-derived growth factor, related protein 3                              | Hdgfrp3 /// T1 | 7.92                 |
| 1438009_ε | similar to histone 2a                                                          | MGC73635       | 7.10                 |
| 1451353_ε | transmembrane 6 superfamily member 1                                           | Tm6sf1         | 5.94                 |
| 1436188_ε | N-myc downstream regulated gene 4                                              | NdrG4          | 5.51                 |
| 1422101_ε | tumor necrosis factor receptor superfamily, member 23                          | Tnfrsf23       | 5.18                 |
| 1451418_ε | splA/ryanodine receptor domain and SOCS box containing 4                       | Spsb4          | 5.01                 |
| 1442366_ε | RIKEN cDNA 6820408C15 gene                                                     | 6820408C15     | 5.00                 |
| 1418820_ε | zinc finger, CCHC domain containing 10                                         | Zcchc10        | 4.95                 |
| 1427477_ε | transmembrane protease, serine 13                                              | Tmprss13       | 4.89                 |
| 1434447_ε | expressed sequence AI838057                                                    | AI838057       | 4.87                 |
| 1449854_ε | nuclear receptor subfamily 0, group B, member 2                                | Nr0b2          | 4.76                 |
| 1436808_χ | minichromosome maintenance deficient 5, cell division cycle 46 (S. cerevisiae) | Mcm5           | 4.60                 |
| 1419153_ε | RIKEN cDNA 2810417H13 gene                                                     | 2810417H13     | 4.58                 |
| 1426615_ε | N-myc downstream regulated gene 4                                              | NdrG4          | 4.57                 |
| 1426095_ε | tumor necrosis factor receptor superfamily, member 22                          | Tnfrsf22       | 4.49                 |
| 1416006_ε | midkine                                                                        | Mdk            | 4.43                 |
| 1434437_χ | ribonucleotide reductase M2                                                    | Rrm2           | 4.24                 |
| 1455509_ε | cDNA sequence AB182283                                                         | AB182283       | 4.19                 |
| 1425179_ε | serine hydroxymethyl transferase 1 (soluble)                                   | Shmt1          | 4.14                 |
| 1449133_ε | small proline-rich protein 1A                                                  | Sprr1a         | 4.11                 |
| 1424530_ε | SEC14-like 2 (S. cerevisiae)                                                   | Sec14l2        | 4.01                 |
| 1442590_ε | tumor necrosis factor receptor superfamily, member 23                          | Tnfrsf23       | 4.00                 |
| 1423101_ε | progesterin and adipoQ receptor family member IV                               | Paqr4          | 3.88                 |
| 1426817_ε | antigen identified by monoclonal antibody Ki 67                                | Mki67 /// LOC  | 3.76                 |
| 1460081_ε | Synaptotagmin VII                                                              | Syt7           | 3.75                 |
| 1420984_ε | phosphatidylcholine transfer protein                                           | Pctp           | 3.74                 |
| 1417275_ε | myelin and lymphocyte protein, T-cell differentiation protein                  | Mal            | 3.64                 |
| 1438187_ε | solute carrier family 25 (mitochondrial carrier, palmitoylcarnitine transport) | Slc25a29       | 3.62                 |
| 1415995_ε | caspase 6                                                                      | Casp6          | 3.61                 |
| 1432181_ε | endothelial cell growth factor 1 (platelet-derived)                            | Ecgf1          | 3.60                 |
| 1429529_ε | tRNA splicing endonuclease 54 homolog (SEN54, S. cerevisiae)                   | Tsen54         | 3.56                 |
| 1424143_ε | chromatin licensing and DNA replication factor 1                               | Cdt1           | 3.44                 |
| 1448562_ε | uridine phosphorylase 1                                                        | Upp1           | 3.43                 |
| 1416263_ε | ATP-binding cassette, sub-family B (MDR/TAP), member 9                         | Abcb9          | 3.40                 |
| 1425681_ε | prion protein dublet                                                           | Prnd           | 3.39                 |
| 1417457_ε | CDC28 protein kinase regulatory subunit 2                                      | Cks2           | 3.36                 |
| 1425094_ε | LIM homeobox protein 6                                                         | Lhx6           | 3.33                 |
| 1438852_χ | minichromosome maintenance deficient 6 (MIS5 homolog, S. pombe) (S.            | Mcm6           | 3.32                 |
| 1441927_ε | Synaptotagmin VII                                                              | Syt7           | 3.31                 |
| 1447842_χ | Transcobalamin 2                                                               | Tcn2           | 3.30                 |
| 1459978_χ | cyclin J-like                                                                  | Ccnj1          | 3.30                 |
| 1437716_χ | kinesin family member 22                                                       | Kif22          | 3.29                 |
| 1427931_ε | pyridoxal (pyridoxine, vitamin B6) kinase                                      | Pdxk           | 3.26                 |
| 1448226_ε | ribonucleotide reductase M2                                                    | Rrm2           | 3.25                 |
| 1435175_ε | cDNA sequence BC034090                                                         | BC034090       | 3.25                 |
| 1426554_ε | phosphoglycerate mutase 1                                                      | Pgam1 /// LC   | 3.19                 |
| 1442754_ε | RIKEN cDNA C030013G03 gene                                                     | C030013G03     | 3.19                 |
| 1433855_ε | 4-aminobutyrate aminotransferase                                               | Abat           | 3.16                 |
| 1457825_χ | transcobalamin 2                                                               | Tcn2           | 3.16                 |
| 1453377_ε | SH2 domain containing 4A                                                       | Sh2d4a         | 3.16                 |
| 1433888_ε | ATPase, Ca++ transporting, plasma membrane 2                                   | Atp2b2         | 3.16                 |
| 1454694_ε | topoisomerase (DNA) II alpha                                                   | Top2a          | 3.12                 |
| 1434930_ε | two pore channel 1                                                             | Tpcn1          | 3.10                 |

## GeneList\_PGC\_Dox\_PGC\_Wt\_PGC\_Jun

|           |                                                                                  |               |      |
|-----------|----------------------------------------------------------------------------------|---------------|------|
| 1433750_ε | solute carrier family 31, member 1                                               | Slc31a1       | 3.10 |
| 1450772_ε | wingless-related MMTV integration site 11                                        | Wnt11         | 3.09 |
| 1418976_ε | cell death-inducing DNA fragmentation factor, alpha subunit-like effector 1      | Cideb         | 3.08 |
| 1428986_ε | solute carrier family 17 (sodium-dependent inorganic phosphate cotransporter)    | Slc17a7       | 3.08 |
| 1439036_ε | ATPase, Na <sup>+</sup> /K <sup>+</sup> transporting, beta 1 polypeptide         | Atp1b1        | 3.07 |
| 1441259_ε | intraflagellar transport 122 homolog (Chlamydomonas)                             | Ift122        | 3.07 |
| 1441943_γ | Cytokine induced apoptosis inhibitor 1                                           | Ciapin1       | 3.04 |
| 1455106_ε | creatine kinase, brain                                                           | Ckb           | 3.04 |
| 1448200_ε | transcobalamin 2                                                                 | Tcn2          | 3.03 |
| 1447800_γ | Transcobalamin 2                                                                 | Tcn2          | 3.03 |
| 1415910_ε | cytokine induced apoptosis inhibitor 1                                           | Ciapin1       | 3.02 |
| 1416783_ε | tachykinin 1                                                                     | Tac1          | 3.01 |
| 1448627_ε | PDZ binding kinase                                                               | Pbk           | 3.00 |
| 1439185_γ | RIKEN cDNA D430028G21 gene                                                       | D430028G21    | 3.00 |
| 1460241_ε | ST3 beta-galactoside alpha-2,3-sialyltransferase 5                               | St3gal5       | 2.99 |
| 1448140_ε | cytokine induced apoptosis inhibitor 1                                           | Ciapin1       | 2.98 |
| 1454764_ε | solute carrier family 38, member 1                                               | Slc38a1       | 2.98 |
| 1451371_ε | melanocortin 2 receptor accessory protein                                        | Mrap          | 2.97 |
| 1436874_γ | solute carrier family 25 (mitochondrial carrier, adenine nucleotide translocase) | Slc25a5       | 2.95 |
| 1416165_ε | RAB31, member RAS oncogene family                                                | Rab31         | 2.95 |
| 1430542_ε | solute carrier family 25 (mitochondrial carrier, adenine nucleotide translocase) | Slc25a5 /// E | 2.91 |
| 1455301_ε | WAS/WASL interacting protein family, member 3                                    | Wipf3         | 2.91 |
| 1451419_ε | splA/ryanodine receptor domain and SOCS box containing 4                         | Spsb4         | 2.90 |
| 1422930_ε | intercellular adhesion molecule 4, Landsteiner-Wiener blood group                | Icam4         | 2.89 |
| 1452534_ε | high mobility group box 2                                                        | Hmgb2 /// LC  | 2.88 |
| 1417910_ε | cyclin A2                                                                        | Ccna2         | 2.82 |
| 1424316_ε | solute carrier family 25 (mitochondrial deoxynucleotide carrier), member 19      | Slc25a19      | 2.82 |
| 1431893_ε | prenyl (solaneyl) diphosphate synthase, subunit 1                                | Pdss1         | 2.81 |
| 1423294_ε | mesoderm specific transcript                                                     | Mest          | 2.81 |
| 1423979_ε | solute carrier family 25 (mitochondrial carrier, palmitoylcarnitine transporter) | Slc25a29      | 2.81 |
| 1437313_γ | high mobility group box 2                                                        | Hmgb2 /// LC  | 2.80 |
| 1439377_γ | cell division cycle 20 homolog (S. cerevisiae)                                   | Cdc20         | 2.76 |
| 1417405_ε | START domain containing 3                                                        | Stard3        | 2.75 |
| 1451123_ε | RIKEN cDNA C330016O10 gene                                                       | C330016O10    | 2.74 |
| 1415792_ε | RanBP-type and C3HC4-type zinc finger containing 1                               | Rbck1         | 2.73 |
| 1434239_ε | ribosomal RNA processing 12 homolog (S. cerevisiae)                              | Rrp12         | 2.70 |
| 1454109_ε | phosphatidylserine receptor                                                      | Ptdsr         | 2.69 |
| 1420056_ε | phosphatidylserine receptor                                                      | Ptdsr         | 2.69 |
| 1432558_ε | myelin and lymphocyte protein, T-cell differentiation protein                    | Mal           | 2.69 |
| 1452242_ε | centrosomal protein 55                                                           | Cep55         | 2.67 |
| 1416514_ε | fascin homolog 1, actin bundling protein (Strongylocentrotus purpuratus)         | Fscn1         | 2.67 |
| 1435517_γ | v-ral simian leukemia viral oncogene homolog B (ras related)                     | Ralb          | 2.67 |
| 1416431_ε | tubulin, beta 6                                                                  | Tubb6         | 2.66 |
| 1417911_ε | cyclin A2                                                                        | Ccna2         | 2.66 |
| 1415945_ε | minichromosome maintenance deficient 5, cell division cycle 46 (S. cerevisiae)   | Mcm5          | 2.66 |
| 1449040_ε | selenophosphate synthetase 2                                                     | Sephs2        | 2.65 |
| 1448224_ε | transcription factor A, mitochondrial                                            | Tfam          | 2.65 |
| 1450424_ε | interleukin 18 binding protein                                                   | Il18bp        | 2.64 |
| 1453416_ε | growth arrest-specific 2 like 3                                                  | Gas2l3        | 2.64 |
| 1416503_ε | latexin                                                                          | Lxn           | 2.63 |
| 1417902_ε | solute carrier family 19 (thiamine transporter), member 2                        | Slc19a2       | 2.63 |
| 1448635_ε | structural maintenance of chromosomes 2                                          | Smc2          | 2.62 |
| 1423809_ε | transcription factor 19                                                          | Tcf19         | 2.62 |
| 1455179_ε | membrane protein, palmitoylated 7 (MAGUK p55 subfamily member 7)                 | Mpp7          | 2.61 |
| 1449536_ε | potassium intermediate/small conductance calcium-activated channel, subfamily 1  | Kcnn1         | 2.61 |
| 1454604_ε | tetraspanin 12                                                                   | Tspan12       | 2.61 |
| 1418572_γ | tumor necrosis factor receptor superfamily, member 12a                           | Tnfrsf12a     | 2.59 |
| 1455627_ε | procollagen, type VIII, alpha 1                                                  | Col8a1        | 2.57 |
| 1415903_ε | solute carrier family 38, member 1                                               | Slc38a1       | 2.57 |
| 1455923_ε | potassium channel tetramerisation domain containing 8                            | Kctd8         | 2.57 |
| 1429054_ε | mitochondrial ribosomal protein L47                                              | Mrpl47        | 2.57 |
| 1434897_ε | solute carrier family 25 (mitochondrial carrier, adenine nucleotide translocase) | Slc25a4       | 2.56 |
| 1431292_ε | twinfilin, actin-binding protein, homolog 2 (Drosophila)                         | Twf2          | 2.56 |
| 1429106_ε | RIKEN cDNA 4921509J17 gene                                                       | 4921509J17    | 2.53 |

## GeneList\_PGC\_Dox\_PGC\_Wt\_PGC\_Jun

|                                                                                         |               |      |
|-----------------------------------------------------------------------------------------|---------------|------|
| 1424171_ε hydroxyacyl glutathione hydrolase                                             | Hagh          | 2.53 |
| 1434801_γ solute carrier family 25 (mitochondrial carrier, adenine nucleotide transloc  | Slc25a5       | 2.52 |
| 1452061_ε spermatid perinuclear RNA binding protein                                     | Strbp         | 2.52 |
| 1421811_ε thrombospondin 1                                                              | Thbs1 /// LO  | 2.51 |
| 1420380_ε chemokine (C-C motif) ligand 2                                                | Ccl2          | 2.51 |
| 1439410_γ solute carrier family 25, member 39                                           | Slc25a39      | 2.50 |
| 1433918_ε autophagy-related 4D (yeast)                                                  | Atg4d         | 2.50 |
| 1416399_ε heme oxygenase (decycling) 2                                                  | Hmox2         | 2.48 |
| 1428542_ε RIKEN cDNA 2010003J03 gene                                                    | 2010003J03I   | 2.48 |
| 1418571_ε tumor necrosis factor receptor superfamily, member 12a                        | Tnfrsf12a     | 2.47 |
| 1424951_ε BAI1-associated protein 2-like 1                                              | Baiap2l1      | 2.47 |
| 1441850_γ transcobalamin 2                                                              | Tcn2          | 2.47 |
| 1439740_ε uridine-cytidine kinase 2                                                     | Uck2          | 2.46 |
| 1418253_ε heat shock protein 4 like                                                     | Hspa4l        | 2.45 |
| 1458339_ε cytidine and dCMP deaminase domain containing 1                               | Cdadc1        | 2.44 |
| 1438320_ε minichromosome maintenance deficient 7 (S. cerevisiae)                        | Mcm7          | 2.44 |
| 1439093_at                                                                              |               | 2.43 |
| 1438319_γ FAST kinase domains 2                                                         | Fastkd2       | 2.43 |
| 1429058_ε RIKEN cDNA 1110004B13 gene                                                    | 1110004B13    | 2.43 |
| 1416600_ε Down syndrome critical region homolog 1 (human)                               | Dscr1         | 2.43 |
| 1426875_ε sulfiredoxin 1 homolog (S. cerevisiae)                                        | Srxn1         | 2.42 |
| 1438188_γ solute carrier family 25 (mitochondrial carrier, palmitoylcarnitine transport | Slc25a29      | 2.41 |
| 1439440_γ twinfilin, actin-binding protein, homolog 2 (Drosophila)                      | Twf2          | 2.41 |
| 1423772_ε solute carrier family 25 (mitochondrial carrier, adenine nucleotide transloc  | Slc25a5       | 2.39 |
| 1424076_ε glycerophosphodiester phosphodiesterase domain containing 1                   | Gdpd1         | 2.38 |
| 1421456_ε purinergic receptor P2Y, G-protein coupled 1                                  | P2ry1         | 2.38 |
| 1419103_ε abhydrolase domain containing 6                                               | Abhd6         | 2.37 |
| 1430394_ε ATP-binding cassette, sub-family B (MDR/TAP), member 9                        | Abcb9         | 2.37 |
| 1427239_ε intraflagellar transport 122 homolog (Chlamydomonas)                          | Ift122        | 2.37 |
| 1449010_ε heat shock protein 4 like                                                     | Hspa4l        | 2.36 |
| 1422557_ε metallothionein 1                                                             | Mt1           | 2.36 |
| 1452789_ε stannin                                                                       | Snn           | 2.36 |
| 1441315_ε solute carrier family 19 (thiamine transporter), member 2                     | Slc19a2       | 2.36 |
| 1416554_ε PDZ and LIM domain 1 (elfin)                                                  | Pdlim1        | 2.35 |
| 1444790_ε RIKEN cDNA 1810005K13 gene                                                    | 1810005K13    | 2.34 |
| 1438922_γ solute carrier family 25 (mitochondrial carrier, adenine nucleotide transloc  | Slc25a5 /// E | 2.34 |
| 1424261_ε zinc finger protein 672                                                       | Zfp672        | 2.33 |
| 1460676_ε Josephin domain containing 1                                                  | Josd1         | 2.32 |
| 1418440_ε procollagen, type VIII, alpha 1                                               | Col8a1        | 2.32 |
| 1416823_ε oxysterol binding protein-like 1A                                             | Osbpl1a       | 2.32 |
| 1417458_ε CDC28 protein kinase regulatory subunit 2                                     | Cks2          | 2.31 |
| 1436329_ε early growth response 3                                                       | Egr3          | 2.30 |
| 1437269_ε expressed sequence AW124722                                                   | AW124722      | 2.30 |
| 1418325_ε selenophosphate synthetase 2                                                  | Sephs2        | 2.28 |
| 1423812_ε expressed sequence AW146242                                                   | AW146242      | 2.28 |
| 1451152_ε ATPase, Na <sup>+</sup> /K <sup>+</sup> transporting, beta 1 polypeptide      | Atp1b1        | 2.28 |
| 1436707_γ non-SMC condensin I complex, subunit H                                        | Ncaph         | 2.28 |
| 1452908_ε DIP2 disco-interacting protein 2 homolog A (Drosophila)                       | Dip2a         | 2.27 |
| 1437519_γ hydroxyacyl glutathione hydrolase                                             | Hagh          | 2.27 |
| 1435602_ε Transcribed locus                                                             |               | 2.27 |
| 1416345_ε translocase of inner mitochondrial membrane 8 homolog a1 (yeast)              | Timm8a1       | 2.27 |
| 1429188_ε COX11 homolog, cytochrome c oxidase assembly protein (yeast)                  | Cox11         | 2.26 |
| 1439109_ε coiled-coil domain containing 68                                              | Ccdc68        | 2.25 |
| 1417419_ε cyclin D1                                                                     | Ccnd1         | 2.25 |
| 1451103_ε DNA segment, Chr 14, ERATO Doi 500, expressed                                 | D14Ert500e    | 2.25 |
| 1439012_ε deoxycytidine kinase                                                          | Dck           | 2.25 |
| 1452730_ε RIKEN cDNA 1110033J19 gene                                                    | 1110033J19I   | 2.25 |
| 1424244_ε RWD domain containing 4A                                                      | Rwdd4a        | 2.24 |
| 1460278_ε DNA segment, Chr 15, Wayne State University 75, expressed                     | D15Wsu75e     | 2.24 |
| 1436708_γ minichromosome maintenance deficient 4 homolog (S. cerevisiae)                | Mcm4          | 2.24 |
| 1417417_ε cytochrome c oxidase, subunit VI a, polypeptide 1                             | Cox6a1        | 2.24 |
| 1457983_ε RWD domain containing 4A                                                      | Rwdd4a        | 2.23 |
| 1448604_ε uridine-cytidine kinase 2                                                     | Uck2          | 2.23 |
| 1447819_γ procollagen, type VIII, alpha 1                                               | Col8a1        | 2.23 |

## GeneList\_PGC\_Dox\_PGC\_Wt\_PGC\_Jun

|                                                                                              |               |      |
|----------------------------------------------------------------------------------------------|---------------|------|
| 1428283_ε cytochrome P450, family 2, subfamily s, polypeptide 1                              | Cyp2s1        | 2.23 |
| 1424563_ε solute carrier family 25 (mitochondrial carrier, adenine nucleotide transloc       | Slc25a4       | 2.23 |
| 1433885_ε IQ motif containing GTPase activating protein 2                                    | Iqgap2        | 2.22 |
| 1416601_ε Down syndrome critical region homolog 1 (human)                                    | Dscr1         | 2.22 |
| 1436174_ε ATPase family, AAA domain containing 2                                             | Atad2         | 2.22 |
| 1442465_ε spermatid perinuclear RNA binding protein                                          | Strbp         | 2.22 |
| 1438545_ε solute carrier family 25 (mitochondrial carrier, adenine nucleotide transloc       | Slc25a5 /// E | 2.21 |
| 1423890_γ ATPase, Na+/K+ transporting, beta 1 polypeptide                                    | Atp1b1        | 2.21 |
| 1435244_ε Vav2 oncogene                                                                      | Vav2          | 2.20 |
| 1431464_ε phosphomannomutase 2                                                               | Pmm2          | 2.20 |
| 1438360_γ solute carrier family 25 (mitochondrial carrier, adenine nucleotide transloc       | Slc25a5 /// E | 2.19 |
| 1418860_ε LETM1 domain containing 1                                                          | Letmd1        | 2.19 |
| 1455961_at                                                                                   |               | 2.19 |
| 1430614_ε RIKEN cDNA 4632415K11 gene                                                         | 4632415K11    | 2.19 |
| 1428680_ε CDP-diacylglycerol synthase 1                                                      | Cds1          | 2.18 |
| 1424577_ε misato homolog 1 (Drosophila)                                                      | Msto1         | 2.17 |
| 1431691_ε RAB31, member RAS oncogene family                                                  | Rab31         | 2.17 |
| 1424885_ε kelch domain containing 8A                                                         | Klhdc8a       | 2.17 |
| 1438209_ε RIKEN cDNA 4632404H12 gene                                                         | 4632404H12    | 2.16 |
| 1419617_ε potassium intermediate/small conductance calcium-activated channel, su             | Kcnn1         | 2.16 |
| 1423358_ε RIKEN cDNA 1810009K13 gene                                                         | 1810009K13    | 2.16 |
| 1422628_ε RIKEN cDNA 4632417K18 gene                                                         | 4632417K18    | 2.16 |
| 1420028_ε minichromosome maintenance deficient 3 (S. cerevisiae)                             | Mcm3 /// LOC  | 2.16 |
| 1435703_ε Transcribed locus                                                                  |               | 2.16 |
| 1421097_ε endonuclease G                                                                     | Endog         | 2.16 |
| 1437449_ε radical S-adenosyl methionine domain containing 1                                  | Rsad1         | 2.16 |
| 1418369_ε DNA primase, p49 subunit                                                           | Prim1         | 2.15 |
| 1424110_ε expressed in non-metastatic cells 1, protein                                       | Nme1          | 2.14 |
| 1451176_ε RIKEN cDNA D430028G21 gene                                                         | D430028G21    | 2.14 |
| 1427929_ε pyridoxal (pyridoxine, vitamin B6) kinase                                          | Pdxk          | 2.14 |
| 1434168_ε progressive external ophthalmoplegia 1 (human)                                     | Peo1          | 2.14 |
| 1439436_γ inner centromere protein                                                           | Incenp        | 2.14 |
| 1438317_ε endonuclease G                                                                     | Endog         | 2.14 |
| 1425134_ε phosphatidylinositol glycan anchor biosynthesis, class X                           | Pigx          | 2.13 |
| 1417595_ε mesenchyme homeobox 1                                                              | Meox1         | 2.12 |
| 1436959_γ nasal embryonic LHRH factor                                                        | Nelf          | 2.12 |
| 1421143_ε diaphanous homolog 1 (Drosophila)                                                  | Diap1         | 2.11 |
| 1450697_ε solute carrier family 30 (zinc transporter), member 7                              | Slc30a7       | 2.11 |
| 1423956_ε stromal membrane-associated protein 1                                              | Smap1         | 2.11 |
| 1424219_ε mitochondrial rRNA methyltransferase 1 homolog (S. cerevisiae)                     | Mrm1          | 2.10 |
| 1438178_γ ATPase family, AAA domain containing 3A                                            | Atad3a        | 2.10 |
| 1425178_ε serine hydroxymethyl transferase 1 (soluble)                                       | Shmt1         | 2.10 |
| 1424172_ε hydroxyacyl glutathione hydrolase                                                  | Hagh          | 2.10 |
| 1456813_ε Adult male hypothalamus cDNA, RIKEN full-length enriched library, clone:A230069E07 |               | 2.10 |
| 1419104_ε abhydrolase domain containing 6                                                    | Abhd6         | 2.10 |
| 1425280_ε leukocyte receptor cluster (LRC) member 1                                          | Leng1         | 2.09 |
| 1416698_ε CDC28 protein kinase 1b                                                            | Cks1b         | 2.09 |
| 1417108_ε kinesin light chain 4                                                              | Klc4          | 2.09 |
| 1448698_ε cyclin D1                                                                          | Ccnd1         | 2.09 |
| 1448752_ε carbonic anhydrase 2                                                               | Car2          | 2.09 |
| 1438546_γ solute carrier family 25 (mitochondrial carrier, adenine nucleotide transloc       | Slc25a5 /// E | 2.08 |
| 1452661_ε transferrin receptor                                                               | Tfrc          | 2.08 |
| 1451127_ε expressed sequence AW146242                                                        | AW146242      | 2.08 |
| 1426950_ε poly (ADP-ribose) polymerase family, member 16                                     | Parp16        | 2.08 |
| 1429059_ε RIKEN cDNA 1110004B13 gene                                                         | 1110004B13    | 2.08 |
| 1455428_ε RIKEN cDNA A930008G19 gene                                                         | A930008G19    | 2.07 |
| 1452139_ε solute carrier family 35, member C1                                                | Slc35c1       | 2.07 |
| 1418183_ε pleckstrin homology, Sec7 and coiled-coil domains 1                                | Pscd1         | 2.07 |
| 1458385_ε heat shock protein 4 like                                                          | Hspa4l        | 2.07 |
| 1456912_ε zinc finger protein 691                                                            | Zfp691        | 2.07 |
| 1417499_ε translocase of inner mitochondrial membrane 10 homolog (yeast)                     | Timm10        | 2.07 |
| 1451352_ε metastasis associated 3                                                            | Mta3          | 2.07 |
| 1416346_ε translocase of inner mitochondrial membrane 8 homolog a1 (yeast)                   | Timm8a1       | 2.05 |
| 1455935_ε RIKEN cDNA 2410131K14 gene                                                         | 2410131K14    | 2.05 |

## GeneList\_PGC\_Dox\_PGC\_Wt\_PGC\_Jun

|                                                                                                               |                |      |
|---------------------------------------------------------------------------------------------------------------|----------------|------|
| 1418035_ε DNA primase, p58 subunit                                                                            | Prim2          | 2.05 |
| 1426791_ε RUN and SH3 domain containing 2                                                                     | Rusc2          | 2.04 |
| 1417418_ε cytochrome c oxidase, subunit VI a, polypeptide 1                                                   | Cox6a1 /// LC  | 2.04 |
| 1448787_ε modulator of apoptosis 1                                                                            | Moap1          | 2.04 |
| 1434743_γ RUN and SH3 domain containing 1                                                                     | Rusc1          | 2.04 |
| 1433883_ε tropomyosin 4                                                                                       | Tpm4           | 2.03 |
| 1429475_ε RIKEN cDNA 2810457106 gene                                                                          | 2810457106F    | 2.03 |
| 1425753_ε uracil DNA glycosylase                                                                              | Ung            | 2.03 |
| 1453091_ε LETM1 domain containing 1                                                                           | Letmd1         | 2.03 |
| 1416093_ε mitochondrial ribosomal protein L20                                                                 | Mrpl20         | 2.03 |
| 1436198_ε prolyl endopeptidase                                                                                | Prep           | 2.02 |
| 1427055_ε thioesterase superfamily member 4                                                                   | Them4          | 2.02 |
| 1424213_ε UbiA prenyltransferase domain containing 1                                                          | Ubiad1         | 2.02 |
| 1416067_ε interferon-related developmental regulator 1                                                        | lfrd1          | 2.02 |
| 1454771_at                                                                                                    |                | 2.02 |
| 1417109_ε tubulointerstitial nephritis antigen-like                                                           | Tinagl         | 2.02 |
| 1439965_ε Transcribed locus                                                                                   |                | 2.02 |
| 1456541_γ ATPase family, AAA domain containing 3A                                                             | Atad3a         | 2.01 |
| 1450914_ε protein phosphatase 1, regulatory (inhibitor) subunit 14B                                           | Ppp1r14b       | 2.01 |
| 1439105_ε cytidine and dCMP deaminase domain containing 1                                                     | Cdad1          | 2.01 |
| 1452954_ε ubiquitin-conjugating enzyme E2C                                                                    | Ube2c          | 2.01 |
| 1455341_ε RIKEN cDNA 2010003J03 gene                                                                          | 2010003J03I    | 2.01 |
| 1424243_ε RWD domain containing 4A                                                                            | Rwdd4a         | 2.01 |
| 1423980_ε solute carrier family 25 (mitochondrial carrier, palmitoylcarnitine transport                       | Slc25a29       | 2.01 |
| 1449954_ε hyaluronoglucosaminidase 1                                                                          | Hyal1 /// Natf | 2.00 |
| 1420684_ε acyl-Coenzyme A oxidase 3, pristanoyl                                                               | Acox3          | 2.00 |
| 1417507_ε cytochrome b-561                                                                                    | Cyb561         | 2.00 |
| 1460192_ε oxysterol binding protein-like 1A                                                                   | Osbpl1a        | 1.99 |
| 1440989_at                                                                                                    |                | 1.98 |
| 1418012_ε SH3-domain GRB2-like B1 (endophilin)                                                                | Sh3glb1        | 1.96 |
| 1427100_ε meteorin, glial cell differentiation regulator                                                      | Metm           | 1.94 |
| 1439143_ε RIKEN cDNA A930018M24 gene                                                                          | A930018M24     | 1.94 |
| 1422573_ε AMP deaminase 3                                                                                     | Ampd3          | 1.93 |
| 1428889_ε alkB, alkylation repair homolog 3 (E. coli)                                                         | Alkbh3         | 1.93 |
| 1437629_ε Rho guanine nucleotide exchange factor (GEF) 19                                                     | Arhgef19       | 1.92 |
| 1448777_ε minichromosome maintenance deficient 2 mitotin (S. cerevisiae)                                      | Mcm2           | 1.92 |
| 1420731_ε cysteine and glycine-rich protein 2                                                                 | Csrp2          | 1.91 |
| 1428516_ε alkB, alkylation repair homolog 7 (E. coli)                                                         | Alkbh7         | 1.91 |
| 1449198_ε ST3 beta-galactoside alpha-2,3-sialyltransferase 5                                                  | St3gal5        | 1.91 |
| 1445669_ε sprouty homolog 4 (Drosophila)                                                                      | Spry4          | 1.90 |
| 1451260_ε aldehyde dehydrogenase 1 family, member B1                                                          | Aldh1b1        | 1.88 |
| 1428652_ε RIKEN cDNA 0610010F05 gene                                                                          | 0610010F05     | 1.87 |
| 1449099_ε LPS-responsive beige-like anchor                                                                    | Lrba           | 1.84 |
| 1435717_ε RIKEN cDNA 4833428C12 gene                                                                          | 4833428C12     | 1.84 |
| 1450916_ε staufin (RNA binding protein) homolog 2 (Drosophila)                                                | Stau2          | 1.83 |
| 1423947_ε RIKEN cDNA 1110008P14 gene                                                                          | 1110008P14     | 1.82 |
| AFFX-Trar transferrin receptor                                                                                | Tfrc           | 1.82 |
| 1448938_ε replication protein A3                                                                              | Rpa3           | 1.79 |
| 1433936_ε RIKEN cDNA 0610010E21 gene                                                                          | 0610010E21     | 1.78 |
| 1439482_ε RIKEN cDNA F830021D11 gene                                                                          | F830021D11     | 1.78 |
| 1426612_ε timeless interacting protein                                                                        | Tipin          | 1.77 |
| 1433444_ε 3-hydroxy-3-methylglutaryl-Coenzyme A synthase 1                                                    | Hmgcs1         | 1.73 |
| 1459740_ε uncoupling protein 2 (mitochondrial, proton carrier)                                                | Ucp2           | 1.54 |
| 1423110_ε procollagen, type I, alpha 2                                                                        | Col1a2         | 1.52 |
| 1420961_ε influenza virus NS1A binding protein                                                                | lvns1abp       | 0.82 |
| 1416953_ε connective tissue growth factor                                                                     | Ctgf           | 0.76 |
| 1427183_ε epidermal growth factor-containing fibulin-like extracellular matrix protein                        | Efemp1         | 0.65 |
| 1419606_ε troponin T1, skeletal, slow                                                                         | Tnnt1          | 0.63 |
| 1418457_ε chemokine (C-X-C motif) ligand 14                                                                   | Cxcl14         | 0.61 |
| 1423954_ε complement component 3                                                                              | C3             | 0.61 |
| 1434277_ε yippee-like 2 (Drosophila)                                                                          | Ypel2          | 0.60 |
| 1418403_ε a disintegrin and metallopeptidase domain 19 (meltrin beta)                                         | Adam19         | 0.60 |
| 1419702_ε TATA box binding protein (Tbp)-associated factor, RNA polymerase I, A<br>RIKEN cDNA 2310014F07 gene | Taf1a          | 0.59 |

## GeneList\_PGC\_Dox\_PGC\_Wt\_PGC\_Jun

|                                                                                      |                |      |
|--------------------------------------------------------------------------------------|----------------|------|
| 1449533_ε transmembrane protein 100                                                  | Tmem100        | 0.58 |
| 1455528_ε Transcribed locus                                                          |                | 0.58 |
| 1420930_ε catenin (cadherin associated protein), alpha-like 1                        | Ctnnal1        | 0.58 |
| 1433983_ε Cnksr family member 3                                                      | Cnksr3         | 0.58 |
| 1452888_ε RIKEN cDNA 1110034G24 gene                                                 | 1110034G24     | 0.57 |
| 1423806_ε integrator complex subunit 4                                               | Ints4          | 0.57 |
| 1450084_ε influenza virus NS1A binding protein                                       | Ivns1abp       | 0.56 |
| 1448596_ε solute carrier family 6 (neurotransmitter transporter, creatine), member 8 | Slc6a8         | 0.55 |
| 1455400_ε dimethylarginine dimethylaminohydrolase 1                                  | Ddah1          | 0.55 |
| 1436672_ε G protein-coupled receptor kinase 5                                        | Gprk5          | 0.54 |
| 1438217_ε ataxin 2 binding protein 1                                                 | A2bp1          | 0.54 |
| 1423748_ε pyruvate dehydrogenase kinase, isoenzyme 1                                 | Pdk1           | 0.54 |
| 1447250_ε RIKEN cDNA 2610301F02 gene                                                 | 2610301F02     | 0.54 |
| 1425458_ε growth factor receptor bound protein 10                                    | Grb10          | 0.54 |
| 1437183_ε leucine rich repeat containing 4B                                          | Lrrc4b         | 0.53 |
| 1421011_ε hydroxysteroid (17-beta) dehydrogenase 11                                  | Hsd17b11       | 0.53 |
| 1426236_ε glutamate-ammonia ligase (glutamine synthetase)                            | Glul           | 0.53 |
| 1449799_ε plakophilin 2                                                              | Pkp2           | 0.53 |
| 1425718_ε influenza virus NS1A binding protein                                       | Ivns1abp       | 0.53 |
| 1438577_ε Inositol polyphosphate-4-phosphatase, type II                              | Inpp4b         | 0.52 |
| 1455404_ε junctophilin 2                                                             | Jph2           | 0.52 |
| 1455581_ε hypothetical protein 9530028C05                                            | 9530028C05     | 0.52 |
| 1416046_ε fucosidase, alpha-L- 2, plasma                                             | Fuca2          | 0.52 |
| 1453119_ε OTU domain containing 1                                                    | Otud1          | 0.52 |
| 1434848_ε Transcribed locus                                                          |                | 0.51 |
| 1443939_ε similar to C05G5.5                                                         | LOC230628      | 0.51 |
| 1437617_ε RIKEN cDNA 1110034G24 gene                                                 | 1110034G24     | 0.51 |
| 1417494_ε ceruloplasmin                                                              | Cp             | 0.51 |
| 1455342_ε RIKEN cDNA A230083H22 gene                                                 | A230083H22     | 0.50 |
| 1434931_ε neogenin                                                                   | Neo1           | 0.50 |
| 1452879_ε synaptopodin 2                                                             | Synpo2         | 0.50 |
| 1435752_ε ATP-binding cassette, sub-family C (CFTR/MRP), member 9                    | Abcc9          | 0.50 |
| 1425597_ε quaking                                                                    | Qk             | 0.50 |
| 1421413_ε PDZ and LIM domain 5                                                       | Pdlim5 /// LO  | 0.50 |
| 1417781_ε longevity assurance homolog 4 (S. cerevisiae)                              | Lass4          | 0.50 |
| 1439101_ε RIKEN cDNA D830007F02 gene                                                 | D830007F02     | 0.50 |
| 1430307_ε malic enzyme, supernatant                                                  | Mod1 /// LOC   | 0.50 |
| 1416846_ε PDZ domain containing RING finger 3                                        | Pdzrn3         | 0.50 |
| 1449015_ε resistin like alpha                                                        | Retnla         | 0.49 |
| 1428892_ε peptidylprolyl isomerase (cyclophilin)-like 1                              | Ppil1          | 0.49 |
| 1421929_ε Eph receptor A4                                                            | Epha4          | 0.49 |
| 1418498_ε fibroblast growth factor 13                                                | Fgf13          | 0.49 |
| 1433632_ε interferon regulatory factor 2 binding protein 2                           | Irf2bp2 /// LC | 0.49 |
| 1460521_ε oligonucleotide/oligosaccharide-binding fold containing 2A                 | Obfc2a         | 0.49 |
| 1419499_ε glycerol-3-phosphate acyltransferase, mitochondrial                        | Gpam           | 0.49 |
| 1450123_ε ryanodine receptor 2, cardiac                                              | Ryr2           | 0.49 |
| 1443932_ε kelch domain containing 1                                                  | Klhdc1         | 0.49 |
| 1417383_ε ectonucleoside triphosphate diphosphohydrolase 5                           | Entpd5         | 0.49 |
| 1453435_ε flavin containing monooxygenase 2                                          | Fmo2           | 0.49 |
| 1427685_ε synaptojanin 2                                                             | Synj2          | 0.49 |
| 1417702_ε histamine N-methyltransferase                                              | Hnmt           | 0.49 |
| 1421126_ε ryanodine receptor 2, cardiac                                              | Ryr2           | 0.49 |
| 1444504_ε dehydrogenase/reductase (SDR family) member 7C                             | Dhrs7c         | 0.49 |
| 1430623_ε oligonucleotide/oligosaccharide-binding fold containing 2A                 | Obfc2a         | 0.49 |
| 1449341_ε stomatin                                                                   | Stom           | 0.49 |
| 1430286_ε protein phosphatase 1, regulatory (inhibitor) subunit 14c                  | Ppp1r14c       | 0.49 |
| 1421277_ε spectrin alpha 1                                                           | Spna1 /// LO   | 0.49 |
| 1451871_ε growth hormone receptor                                                    | Ghr            | 0.49 |
| 1423557_ε interferon gamma receptor 2                                                | Ifngr2         | 0.49 |
| 1456424_ε phospholipid transfer protein                                              | Pltp           | 0.48 |
| 1419674_ε dipeptidase 1 (renal)                                                      | Dpep1          | 0.48 |
| 1418402_ε a disintegrin and metallopeptidase domain 19 (meltrin beta)                | Adam19         | 0.48 |
| 1415997_ε thioredoxin interacting protein                                            | Txnip          | 0.48 |
| flavin containing monooxygenase 2                                                    |                |      |

## GeneList\_PGC\_Dox\_PGC\_Wt\_PGC\_Jun

|                                                                      |               |      |
|----------------------------------------------------------------------|---------------|------|
| 1416454_ε actin, alpha 2, smooth muscle, aorta                       | Acta2         | 0.48 |
| 1460518_ε RIKEN cDNA E130119H09 gene                                 | E130119H09    | 0.48 |
| 1429183_ε plakophilin 2                                              | Pkp2          | 0.48 |
| 1452358_ε retinoic acid induced 2                                    | Rai2          | 0.48 |
| 1423222_ε CAP, adenylate cyclase-associated protein, 2 (yeast)       | Cap2          | 0.48 |
| 1417130_ε angiopoietin-like 4                                        | Angptl4       | 0.48 |
| 1418849_γ aquaporin 7                                                | Aqp7          | 0.48 |
| 1429206_ε Rho-related BTB domain containing 1                        | Rhobtb1       | 0.48 |
| 1425208_ε limb-bud and heart                                         | Lbh           | 0.48 |
| 1434273_ε RIKEN cDNA A830073O21 gene                                 | A830073O21    | 0.48 |
| 1439849_ε Mus musculus, clone IMAGE:4222153, mRNA                    |               | 0.48 |
| 1449244_ε cadherin 2                                                 | Cdh2          | 0.48 |
| 1417701_ε protein phosphatase 1, regulatory (inhibitor) subunit 14c  | Ppp1r14c      | 0.48 |
| 1440374_ε Phosphodiesterase 1C                                       | Pde1c         | 0.48 |
| 1424903_ε jumonji, AT rich interactive domain 1D (Rbp2 like)         | Jarid1d       | 0.48 |
| 1451006_ε xanthine dehydrogenase                                     | Xdh           | 0.48 |
| 1416632_ε malic enzyme, supernatant                                  | Mod1 /// LOC  | 0.48 |
| 1433691_ε protein phosphatase 1, regulatory (inhibitor) subunit 3C   | Ppp1r3c       | 0.47 |
| 1444399_ε oligonucleotide/oligosaccharide-binding fold containing 2A | Obfc2a        | 0.47 |
| 1450828_ε synaptopodin 2                                             | Synpo2        | 0.47 |
| 1419191_ε homeodomain interacting protein kinase 3                   | Hipk3         | 0.47 |
| 1448390_ε dehydrogenase/reductase (SDR family) member 3              | Dhrs3         | 0.46 |
| 1426235_ε glutamate-ammonia ligase (glutamine synthetase)            | Glul          | 0.46 |
| 1423071_γ predicted gene, EG270335                                   | EG270335 //   | 0.46 |
| 1450770_ε RIKEN cDNA 3632451O06 gene                                 | 3632451O06    | 0.46 |
| 1422983_ε integrin beta 6                                            | Itgb6         | 0.46 |
| 1434690_ε lysocardiolipin acyltransferase                            | Lycat         | 0.46 |
| 1417963_ε phospholipid transfer protein                              | Pltp          | 0.46 |
| 1419435_ε aldehyde oxidase 1                                         | Aox1          | 0.46 |
| 1417358_ε sorbin and SH3 domain containing 1                         | Sorbs1        | 0.46 |
| 1435645_ε monocyte to macrophage differentiation-associated          | Mmd /// LOC   | 0.46 |
| 1451606_ε RIKEN cDNA A530016L24 gene                                 | A530016L24    | 0.45 |
| 1434572_ε histone deacetylase 9                                      | Hdac9         | 0.45 |
| 1436619_ε RIKEN cDNA D630045M09 gene                                 | D630045M09    | 0.45 |
| 1420657_ε uncoupling protein 3 (mitochondrial, proton carrier)       | Ucp3          | 0.45 |
| 1428891_at                                                           |               | 0.45 |
| 1436243_ε FERM domain containing 5                                   | Frmf5         | 0.45 |
| 1425631_ε protein phosphatase 1, regulatory (inhibitor) subunit 3C   | Ppp1r3c       | 0.45 |
| 1423183_ε leucine-rich repeat LGI family, member 1                   | Lgi1          | 0.45 |
| 1420408_ε ATP-binding cassette, sub-family C (CFTR/MRP), member 9    | Abcc9         | 0.45 |
| 1451156_ε very low density lipoprotein receptor                      | Vldlr         | 0.45 |
| 1418595_ε plasma membrane associated protein, S3-12                  | S3-12         | 0.45 |
| 1431056_ε lipoprotein lipase                                         | Lpl /// LOC66 | 0.44 |
| 1447658_γ synaptopodin 2-like                                        | Synpo2l       | 0.44 |
| 1422183_ε adrenergic receptor, alpha 1b                              | Adra1b        | 0.44 |
| 1438650_γ gap junction membrane channel protein alpha 1              | Gja1          | 0.44 |
| 1445574_ε Transcribed locus                                          |               | 0.44 |
| 1417780_ε longevity assurance homolog 4 (S. cerevisiae)              | Lass4         | 0.44 |
| 1428444_ε ankyrin repeat and SOCS box-containing protein 2           | Asb2          | 0.44 |
| 1435751_ε ATP-binding cassette, sub-family C (CFTR/MRP), member 9    | Abcc9         | 0.44 |
| 1434465_γ very low density lipoprotein receptor                      | Vldlr         | 0.44 |
| 1457681_ε RIKEN cDNA 2610301F02 gene                                 | 2610301F02    | 0.44 |
| 1452344_ε synaptojanin 2                                             | Synj2         | 0.44 |
| 1418697_ε indolethylamine N-methyltransferase                        | Inmt          | 0.44 |
| 1438945_γ gap junction membrane channel protein alpha 1              | Gja1          | 0.44 |
| 1429656_ε Rho-related BTB domain containing 1                        | Rhobtb1       | 0.44 |
| 1422153_ε ankyrin repeat and SOCS box-containing protein 11          | Asb11         | 0.44 |
| 1451204_ε scavenger receptor class A, member 5 (putative)            | Scara5        | 0.44 |
| 1421453_ε junctophilin 2                                             | Jph2          | 0.44 |
| 1449547_ε ankyrin repeat and SOCS box-containing protein 14          | Asb14         | 0.43 |
| 1422996_ε acyl-CoA thioesterase 2                                    | Acot2         | 0.43 |
| 1460248_ε carboxypeptidase X 2 (M14 family)                          | Cpxm2         | 0.43 |
| 1417765_ε amylase 1, salivary                                        | Amy1          | 0.43 |
|                                                                      | LOC671894     |      |

## GeneList\_PGC\_Dox\_PGC\_Wt\_PGC\_Jun

|            |                                                                                      |               |      |
|------------|--------------------------------------------------------------------------------------|---------------|------|
| 1434673_ε  | G protein-coupled receptor 22                                                        | Gpr22         | 0.43 |
| 1420637_ε  | phosphoribosyl pyrophosphate synthetase 2                                            | Prps2         | 0.43 |
| 1424214_ε  | RIKEN cDNA 9130213B05 gene                                                           | 9130213B05    | 0.43 |
| 1420638_ε  | phosphoribosyl pyrophosphate synthetase 2                                            | Prps2         | 0.43 |
| 1455679_ε  | oligonucleotide/oligosaccharide-binding fold containing 2A                           | Obfc2a        | 0.42 |
| 1437967_ε  | Transcribed locus, moderately similar to XP_001066067.1 hypothetical protein [Rattus |               | 0.42 |
| 1448607_at |                                                                                      |               | 0.42 |
| 1423072_ε  | RIKEN cDNA 6720475J19 gene                                                           | 6720475J19I   | 0.42 |
| 1417190_ε  | pre-B-cell colony-enhancing factor 1                                                 | Pbef1         | 0.42 |
| 1423085_ε  | ephrin B3                                                                            | Efnb3         | 0.41 |
| 1419017_ε  | corin                                                                                | Corin         | 0.41 |
| 1455320_at |                                                                                      |               | 0.41 |
| 1441590_ε  | potassium inwardly-rectifying channel, subfamily J, member 5                         | Kcnj5         | 0.41 |
| 1435956_ε  | FERM domain containing 5                                                             | Frmf5         | 0.41 |
| 1429228_ε  | RIKEN cDNA 4930534B04 gene                                                           | 4930534B04    | 0.41 |
| 1423627_ε  | NAD(P)H dehydrogenase, quinone 1                                                     | Nqo1          | 0.40 |
| 1417900_ε  | very low density lipoprotein receptor                                                | Vldlr         | 0.40 |
| 1449088_ε  | fructose biphosphatase 2                                                             | Fbp2          | 0.40 |
| 1432205_ε  | RIKEN cDNA C130038G02 gene                                                           | C130038G02    | 0.40 |
| 1454843_ε  | phosphoribosyl pyrophosphate synthetase 2                                            | Prps2         | 0.40 |
| 1434780_ε  | RIKEN cDNA C130038G02 gene                                                           | C130038G02    | 0.39 |
| 1449356_ε  | ankyrin repeat and SOCs box-containing protein 5                                     | Asb5          | 0.39 |
| 1449065_ε  | acyl-CoA thioesterase 1                                                              | Acot1         | 0.39 |
| 1419248_ε  | regulator of G-protein signaling 2                                                   | Rgs2          | 0.39 |
| 1415800_ε  | gap junction membrane channel protein alpha 1                                        | Gja1          | 0.39 |
| 1444153_ε  | 16 days neonate heart cDNA, RIKEN full-length enriched library, clone:D830033B01 p   |               | 0.39 |
| 1435371_x  | carboxylesterase 3                                                                   | Ces3          | 0.39 |
| 1437992_x  | gap junction membrane channel protein alpha 1                                        | Gja1          | 0.38 |
| 1451675_ε  | aminolevulinic acid synthase 2, erythroid                                            | Alas2         | 0.38 |
| 1427038_ε  | preproenkephalin 1                                                                   | Penk1         | 0.38 |
| 1427312_ε  | cardiomyopathy associated 5                                                          | Cmya5         | 0.38 |
| 1422997_ε  | acyl-CoA thioesterase 1                                                              | Acot1 /// Aco | 0.38 |
| 1419247_ε  | regulator of G-protein signaling 2                                                   | Rgs2          | 0.38 |
| 1433504_ε  | brain glycogen phosphorylase                                                         | Pygb          | 0.38 |
| 1453486_ε  | signal peptide, CUB domain, EGF-like 2                                               | Scube2        | 0.37 |
| 1421297_ε  | calcium channel, voltage-dependent, L type, alpha 1C subunit                         | Cacna1c       | 0.37 |
| 1438175_x  | myomesin 2                                                                           | Myom2         | 0.37 |
| 1447830_ε  | regulator of G-protein signaling 2                                                   | Rgs2          | 0.37 |
| 1445764_ε  | 16 days neonate heart cDNA, RIKEN full-length enriched library, clone:D830006O14 p   |               | 0.37 |
| 1423859_ε  | prostaglandin D2 synthase (brain)                                                    | Ptgds         | 0.37 |
| 1434672_ε  | G protein-coupled receptor 22                                                        | Gpr22         | 0.36 |
| 1429021_ε  | Eph receptor A4                                                                      | Epha4         | 0.36 |
| 1448595_ε  | brain expressed gene 1                                                               | Bex1          | 0.36 |
| 1444429_ε  | leucine-rich repeats and transmembrane domains 1                                     | Lrtm1         | 0.36 |
| 1443866_ε  | leucine-rich repeats and transmembrane domains 1                                     | Lrtm1         | 0.35 |
| 1416505_ε  | nuclear receptor subfamily 4, group A, member 1                                      | Nr4a1         | 0.34 |
| 1450917_ε  | myomesin 2                                                                           | Myom2         | 0.34 |
| 1418314_ε  | ataxin 2 binding protein 1                                                           | A2bp1         | 0.34 |
| 1455358_ε  | Ataxin 2 binding protein 1                                                           | A2bp1         | 0.34 |
| 1460125_at |                                                                                      |               | 0.34 |
| 1442169_ε  | very low density lipoprotein receptor                                                | Vldlr         | 0.33 |
| 1420806_ε  | fibroblast growth factor 16                                                          | Fgf16         | 0.33 |
| 1435893_ε  | very low density lipoprotein receptor                                                | Vldlr         | 0.33 |
| 1423860_ε  | prostaglandin D2 synthase (brain)                                                    | Ptgds         | 0.33 |
| 1457435_x  | myomesin 2                                                                           | Myom2         | 0.32 |
| 1417714_x  | hemoglobin alpha, adult chain 1                                                      | Hba-a1        | 0.32 |
| 1422804_ε  | serine (or cysteine) peptidase inhibitor, clade B, member 6b                         | Serpnb6b      | 0.32 |
| 1425834_ε  | glycerol-3-phosphate acyltransferase, mitochondrial                                  | Gpam          | 0.32 |
| 1438258_ε  | very low density lipoprotein receptor                                                | Vldlr         | 0.31 |
| 1417273_ε  | pyruvate dehydrogenase kinase, isoenzyme 4                                           | Pdk4          | 0.30 |
| 1438676_ε  | macrophage activation 2 like                                                         | Mpa2l /// LOC | 0.29 |
| 1441111_ε  | 15 days embryo embryonic body below diaphragm cDNA, RIKEN full-length enriched li    |               | 0.28 |
| 1420658_ε  | uncoupling protein 3 (mitochondrial, proton carrier)                                 | Ucp3          | 0.28 |
|            | RIKEN cDNA 4930534B04 gene                                                           |               |      |



GeneList\_PGC\_Dox\_PGC\_Wt\_PGC\_Jun

|                                                                                                 |            |      |
|-------------------------------------------------------------------------------------------------|------------|------|
| 1439066_ε angiopoietin 1                                                                        | Angpt1     | 0.26 |
| 1419184_ε four and a half LIM domains 2                                                         | Fhl2       | 0.26 |
| 1426672_ε transmembrane protein 16K                                                             | Tmem16k    | 0.25 |
| 1415801_ε gap junction membrane channel protein alpha 1                                         | Gja1       | 0.25 |
| 1429229_ε RIKEN cDNA 4930534B04 gene                                                            | 4930534B04 | 0.24 |
| 1447927_ε macrophage activation 2 like                                                          | Mpa2l      | 0.24 |
| 1460061_ε Adult male olfactory brain cDNA, RIKEN full-length enriched library, clone:6430530M09 |            | 0.23 |
| 1435370_ε carboxylesterase 3                                                                    | Ces3       | 0.23 |
| 1449081_ε carboxylesterase 3                                                                    | Ces3       | 0.20 |
| 1436275_at                                                                                      | Kcnip2     | 0.16 |
