# Supplementary material
Source: PubMed Central journal article supplement (PMC2932777)

## Hierarchical clustering of regulated probe-sets

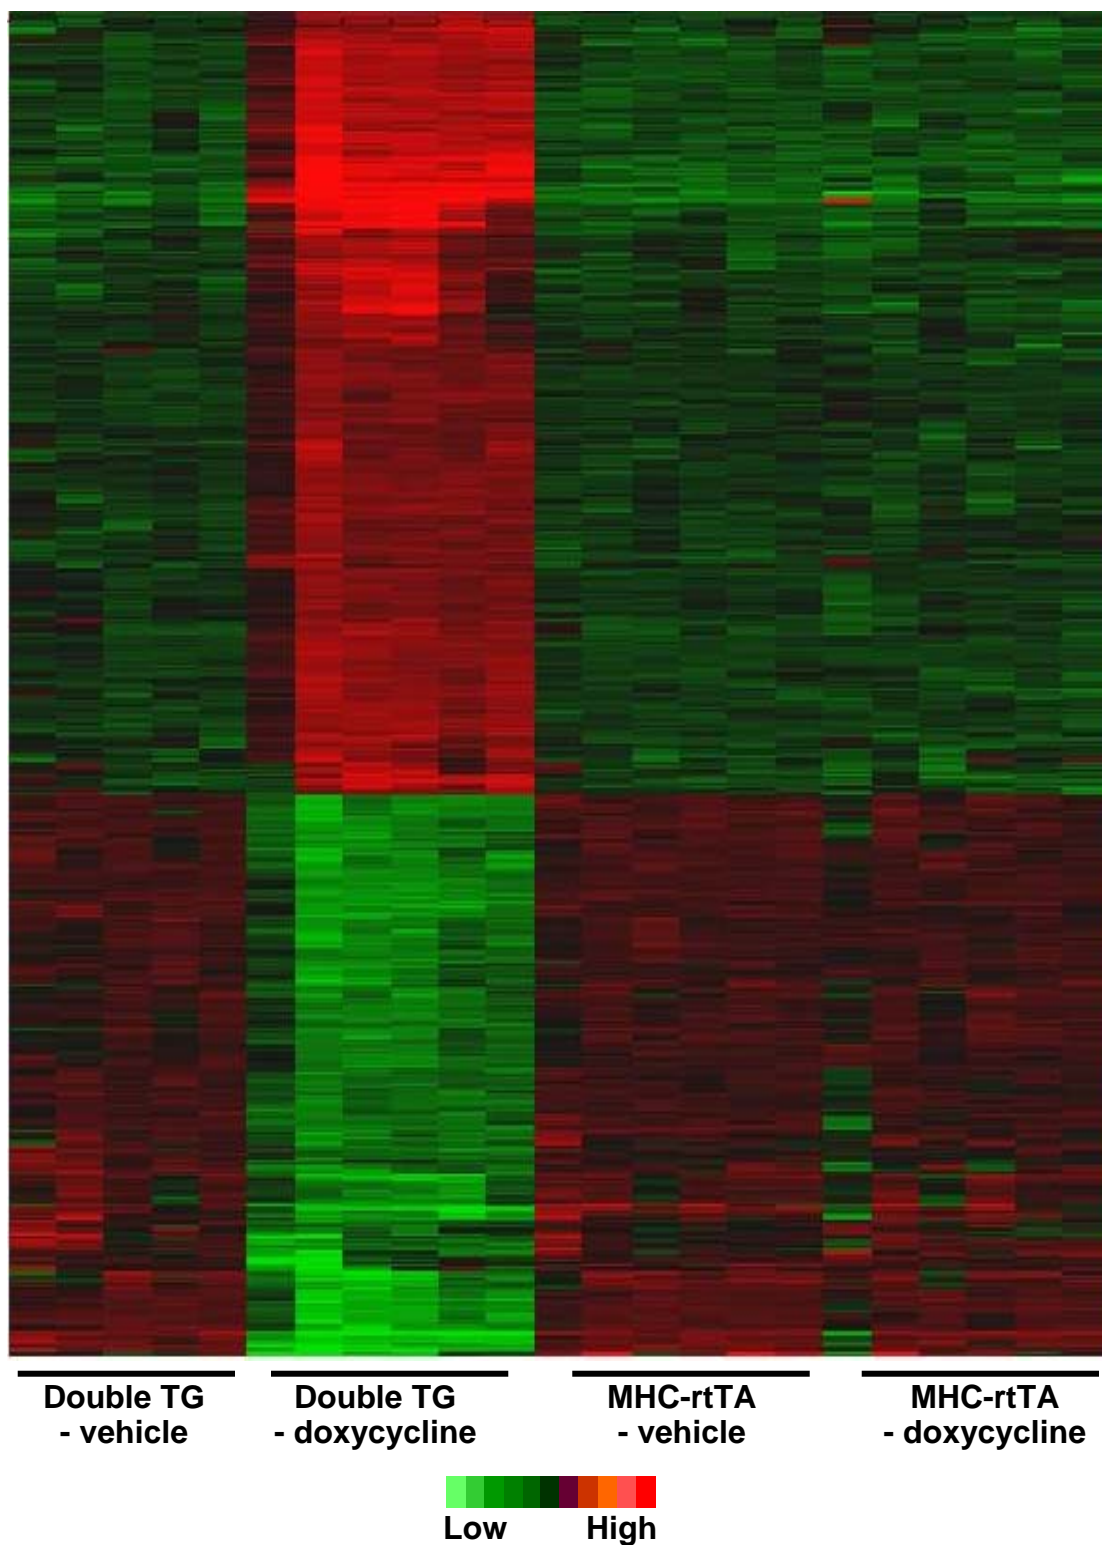

Supplement: NIHMS218922-supplement-02.pdf [file NIHMS218922-supplement-02.pdf]
